# Supplementary material for: Non-linear optical properties of gold quantum clusters. The smaller the better
Source: Royal Society of Chemistry journal article supplement (doi:10.1039/c4nr03782k), 2014-01-01
Supplement: c4nr03782k1.pdf [file c4nr03782k1.pdf]

SUPPORTING INFORMATION

## **Non-linear optical properties of gold quantum clusters. The smaller the better.**

Isabelle Russier-Antoine, Franck Bertorelle, Marin Vojkovic, Driss Rayane, Estelle Salmon, Christian Jonin, Philippe Dugourd, Rodolphe Antoine\* and Pierre-François Brevet

### **Synthesis and purification of protected gold $\text{Au}_{15}\text{SG}_{13}$ clusters.**

The pure form of  $\text{Au}_{15}\text{SG}_{13}$  was synthesized as follows:

235 mg of Glutathion (GSH) was dissolved in 35 ml of methanol and 4 ml of tributylamin in a 100 ml balloon. Then 15 ml of diethyl ether was added followed by 5 ml of a water gold solution (100 mg of  $\text{HAuCl}_4 \cdot 3\text{H}_2\text{O}$ ). Solution was mixed at  $-10\text{ }^\circ\text{C}$  during 1 hour and 24 mg of tetrabutylammonium borohydride powder was added. 4 hours later 10 mg of tetrabutylammonium borohydride was added and mixed 2 hours more. The yellow solution was kept the night at ambient temperature before being concentrated to a volume of  $\approx 5$  ml in a rotary evaporator. Then maximum of the organic phase (tributylamin) was removed with a pipette and the aqueous phase was transfer in a 30 ml Teflon centrifuge tube. 5 ml of methanol was added followed by 20 ml of diethyl ether to induce precipitation. After centrifugation (5 mn/9000 rpm), supernatant was removed. Precipitated was washed two times to removed unreacted glutathione with a cycle: dissolution/precipitation/centrifugation (1.5 ml of ammoniac 10 % for dissolution, 20 ml of methanol for precipitation). Clusters were dissolved in 20 ml of water and 400  $\mu\text{l}$  of acetic acid was added to induce precipitation of the unwanted Au-SG chains. After one night solution was centrifuged (12000 rpm-20 min) and the yellow supernatant was concentrated to 5 ml a rotary evaporator before being precipitated with methanol. A last cycle of dissolution/precipitation in ammoniac (3 %)/methanol was done before drying the yellow powder. About 38 mg of  $\text{Au}_{15}\text{SG}_{13}$  was obtained.

A pictorial view of the different step of synthesis and purification is given in fig. S1.

## Synthesis :

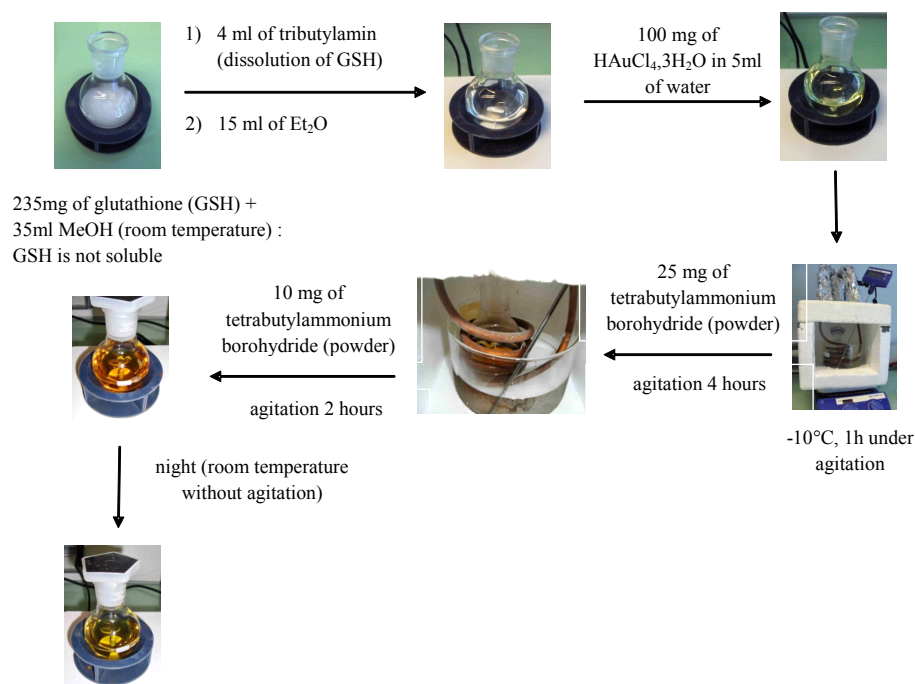

## Purification :

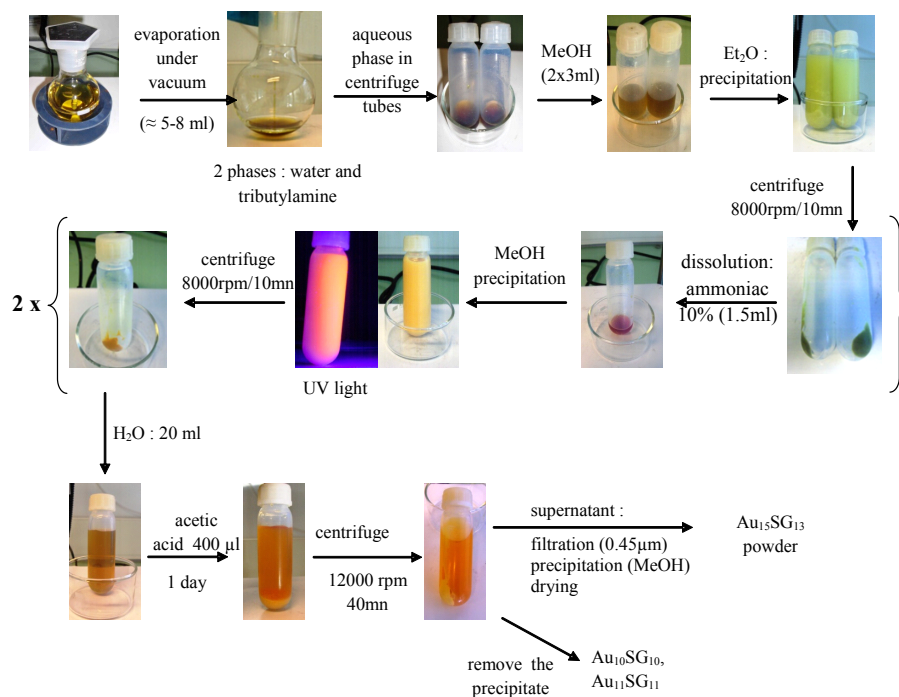

Figure S1 : pictorial view of the different steps of synthesis and purification for  $\text{Au}_{15}\text{SG}_{13}$  clusters

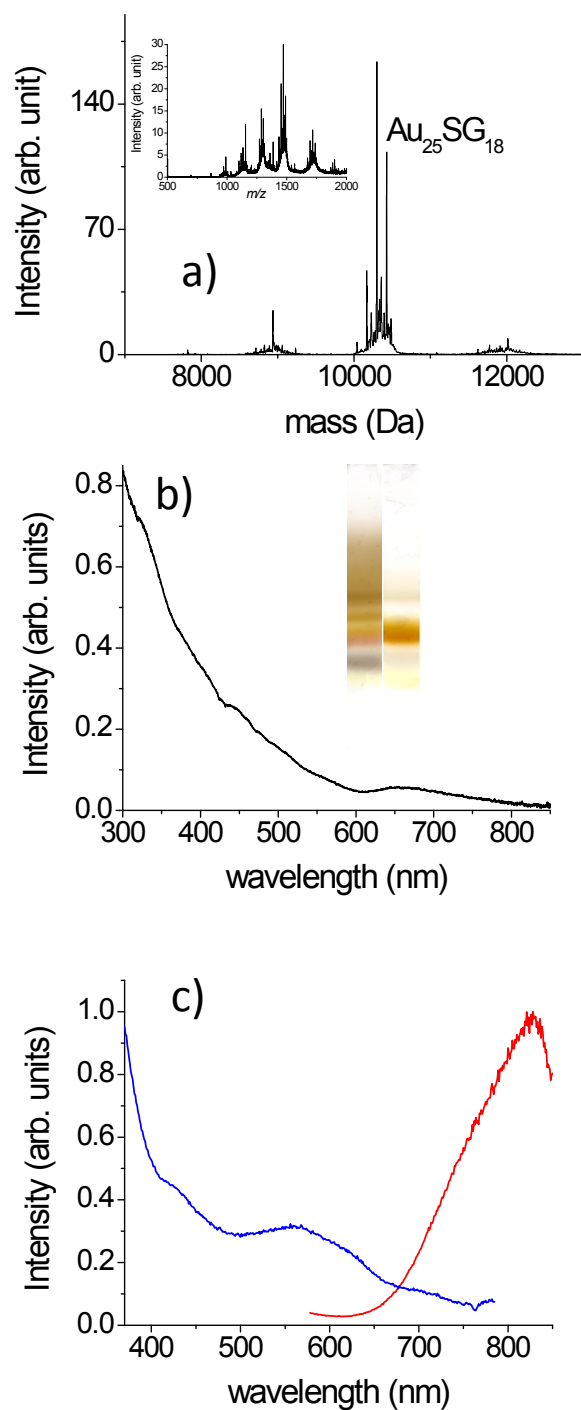

Figure S2 : (a) ESI deconvoluted spectrum of  $\text{Au}_{25}\text{SG}_{18}$ , using a multiplicative correlation algorithm. Inset. ESI mass spectrum for the protected  $\text{Au}_{25}\text{SG}_{18}$  cluster from water solution, and acquired under gentle ESI conditions. (b) (Black line) Absorption spectrum of  $\text{Au}_{25}\text{SG}_{18}$ . Inset: PAGE for Au:SG clusters using (left) Tsukuda synthesis (see ref. 19) and (right) our synthesis. (c) Photoexcitation (with an emission at 820 nm) and emission spectra (with an excitation at 435 nm) of  $\text{Au}_{25}\text{SG}_{18}$ .

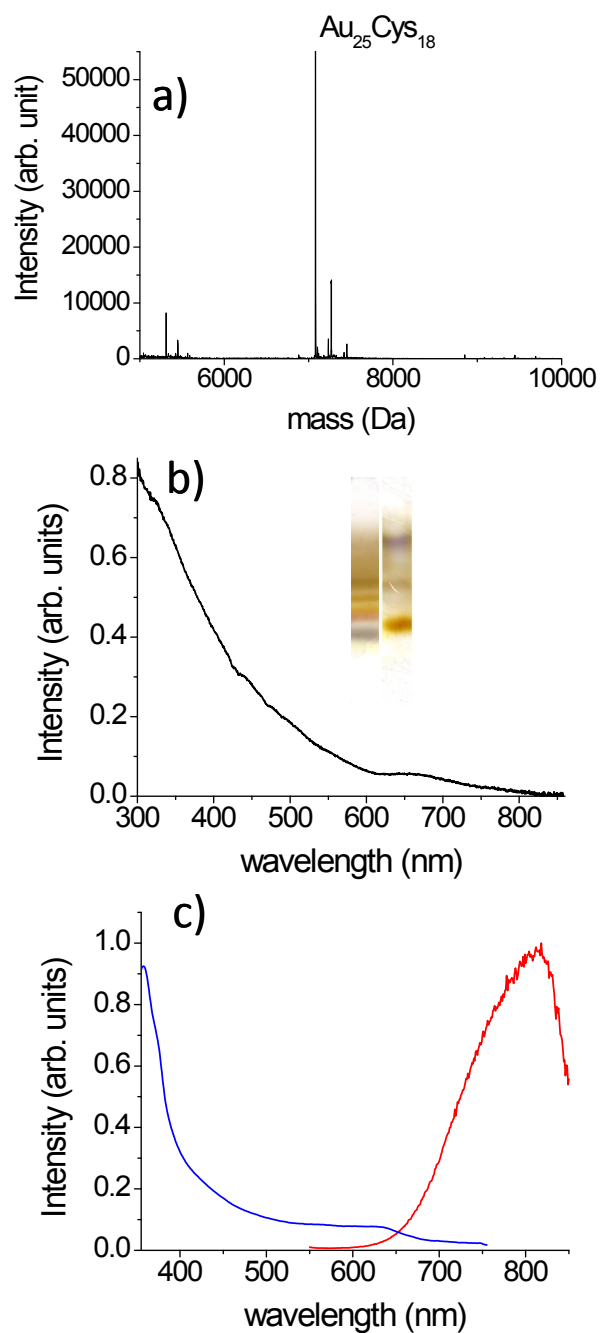

Figure S3 : (a) ESI deconvoluted spectrum of  $\text{Au}_{25}\text{Cys}_{18}$ , using a multiplicative correlation algorithm. (b) (Black line) Absorption spectrum of  $\text{Au}_{25}\text{Cys}_{18}$ . Inset: PAGE for Au:SG clusters using (left) Tsukuda synthesis (see ref. 19) and (right) our synthesis. (c) Photoexcitation (with an emission at 820 nm) and emission spectra (with an excitation at 435 nm) of  $\text{Au}_{25}\text{Cys}_{18}$ .

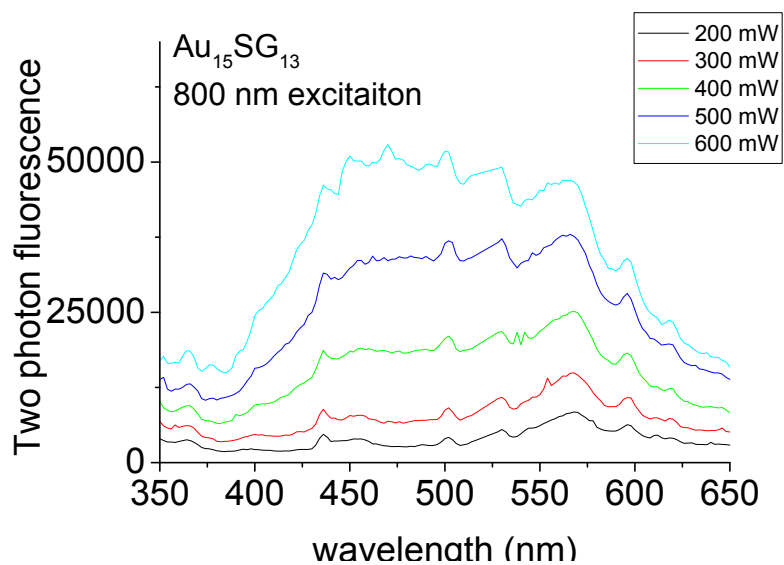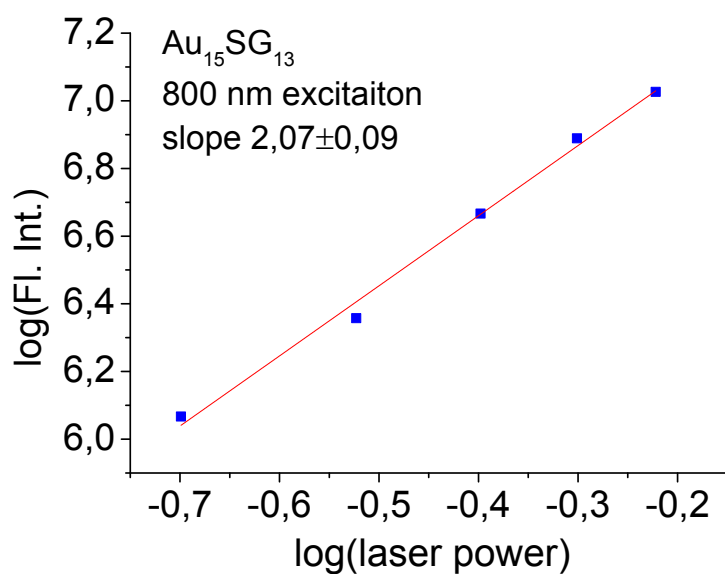

Figure S4 : Two-photon emission spectra at different pump powers for  $\text{Au}_{15}\text{SG}_{13}$  clusters after excitation at 800 nm (top). Power dependence of emission is also provided (bottom).

Table S1 : first hyperpolarizability values for gold NPs. (data from ref. **Multipolar Contributions of the Second Harmonic Generation from Silver and Gold Nanoparticles**, I. Russier-Antoine, E. Benichou, G. Bachelier, C. Jonin, and, and P. F. Brevet, *The Journal of Physical Chemistry C* **2007** 111 (26), 9044-9048)

| Gold spheres | Number of atoms | $10^{30} \cdot \beta$ (esu)<br>(water = $0.56 \cdot 10^{-30}$ esu) | $10^{30} \cdot \beta$ (esu)<br>(water = $0.087 \cdot 10^{-30}$ esu) | $10^{30} \cdot \beta$ /atom<br>(water = $0.087 \cdot 10^{-30}$ esu) |
|--------------|-----------------|--------------------------------------------------------------------|---------------------------------------------------------------------|---------------------------------------------------------------------|
| Au10nm       | 30 900          | 50 000                                                             | 7768                                                                | 0.25                                                                |
| Au20nm       | 247 200         | 270 000                                                            | 41 946                                                              | 0.17                                                                |
| Au50nm       | 3 862 500       | 800 000                                                            | 124 286                                                             | 0.032                                                               |

### TPA experimental arrangement.

The light source for the present TPA experiments was a mode-locked femtosecond Ti:sapphire laser delivering at the fundamental wavelength of 780 nm pulses with a duration of about 140 femtoseconds at a repetition rate of 76 MHz. The beam was gently focussed by a low NA microscope objective to a waist of 5.4  $\mu\text{m}$  and sent in transmission into a 1 cm path length spectrophotometric cuvette. The transmitted light was detected with a large aperture photodiode. The incident power was controlled with a half-wave plate and a polarizing cube. The sample absorption, the concentration of which was set to 5 mM, was then determined as a function of the incident power. Such an experimental set-up is effectively a P-scan set-up. The calibration of the photodiode signal was obtained prior to the experiment by removing the cuvette and varying the incident power. A typical nonlinear absorption plot is shown below at 780 nm. As expected, in absence of the cell, the plot exhibits a linear behavior with a slope of unity whereas in the presence of the cell, a decrease of the transmitted intensity is observed as the absorption increases due to a nonlinear contribution.

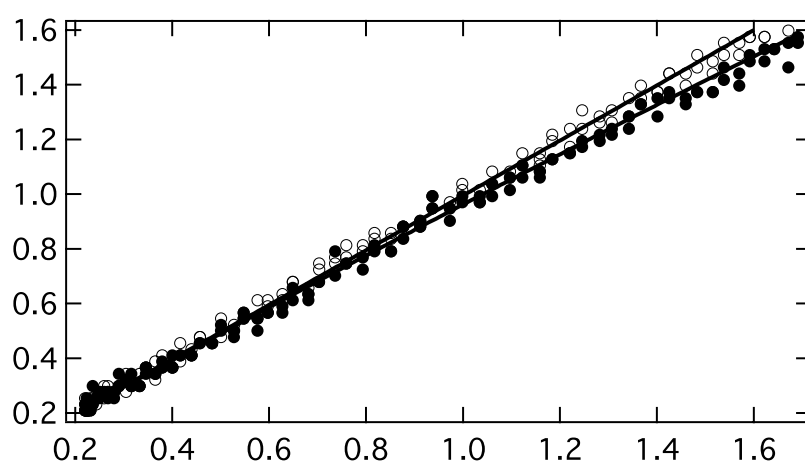

Figure S5 : Transmitted intensity recorded at 780 nm (empty circles) in absence of the cell, (filled circles) with the cell. Solid lines are fit using a nonlinear absorption.
